# Supplementary material for: Leukoplakia, Oral Cavity Cancer Risk, and Cancer Survival in the U.S. Elderly
Source: Oxford University Press journal article supplement (doi:10.1158/1940-6207.capr-15-0091), 2015-07-09
Supplement: 19406207capr150091-sup-146152_2_supp_3025103_nq5dmp.doc [file 19406207capr150091-sup-146152_2_supp_3025103_nq5dmp.doc]

Supplementary Table 1: Comparison of American Joint Committee on Cancer (AJCC) stage to SEER historic stage within the SEER database.

|  | SEER Historic Stage, N(%) | | | |
| --- | --- | --- | --- | --- |
| AJCC Stage Group, 6th Ed. | Localized | Regional | Distant | Unknown Stage |
| I | 6743 (71.2) | 963 (5.9) | 2 (0.1) | 0 |
| II | 2369 (25.0) | 1579 (9.6) | 14 (0.3) | 0 |
| III | 321 (3.4) | 4202 (25.6) | 186 (4.0) | 0 |
| IV | 38 (0.4) | 9676 (58.9) | 4435 (95.6) | 0 |
| Unknown Stage | 3647 | 2701 | 274 | 2428 |

Counts represent all malignant oral cavity cancer cases identified in SEER areas between 2004 and 2009, including cases not linked to Medicare .

Supplementary Table 2: Primary treatment for oral cavity cancer cases.

|  | **Surgical Treatment** | | | **Radiation Treatment*** | | |
| --- | --- | --- | --- | --- | --- | --- |
| N (%) | **Yes** | **No** | **p-value** | **Yes** | **No** | **p-value** |
| **All cases** |  |  |  |  |  |  |
| No prior leukoplakia claim | 4959 (62%) | 3088 (38%) |  | 3934 (50%) | 3933 (50%) |  |
| Prior leukoplakia claim | 534 (84%) | 105 (16%) | <0.001 | 183 (29%) | 450 (71%) | <0.001 |
| **Localized stage cases** |  |  |  |  |  |  |
| No prior leukoplakia claim | 2444 (83%) | 492 (17%) |  | 767 (27%) | 2121 (73%) |  |
| Prior leukoplakia claim | 369 (92%) | 31 (8%) | <0.001 | 66 (17%) | 332 (83%) | <0.001 |
| **Regional stage cases** |  |  |  |  |  |  |
| No prior leukoplakia claim | 1888 (55%) | 1520 (45%) |  | 2353 (71%) | 974 (29%) |  |
| Prior leukoplakia claim | 133 (77%) | 40 (23%) | <0.001 | 93 (55%) | 77 (45%) | <0.001 |
| **Distant stage cases** |  |  |  |  |  |  |
| No prior leukoplakia claim | 325 (41%) | 477 (59%) |  | 541 (69%) | 247 (31%) |  |
| Prior leukoplakia claim | ** (65%) | ** (35%) | 0.018 | ** (64%) | ** (36%) | 0.617 |

*186 cancer cases are excluded because they did not have information on whether or not radiation treatment was received (6 cases occurred after leukoplakia).

** The total number of distant stage cases with a prior leukoplakia is less than 30. In order to preserve subject’s anonymity, numbers are suppressed when a count of <11 can be derived, in accordance with the SEER-Medicare data use agreement.

References:
